# Supplementary material for: Extramacrochaetae regulates Notch signaling in the Drosophila eye through non-apoptotic caspase activity
Source: eLife. 2024 Nov 20;12:RP91988. doi: 10.7554/eLife.91988 (PMC11578588; doi:10.7554/eLife.91988)
Supplement: Figure 1—source data 1. [file elife-91988-fig1-data1.xlsx]

## Sheet: Figure 1N
FRT80	Clone											Sum	Twin-spot											Sum	Ratio (Clone/Twin-Spot)	Log Scale
Sample 1	165.892	136.715	223.675	123.044	171.495	549.531						1370.35	138.284	333.496	111.165	423.369	635.614							1641.93	0.834599	-0.078522
Sample 2	283.884	45.498	444.731	183.916	472.733							1430.76	78.18	144.826	269.786	252.805	144.505	305.032	248.96	318.168				1762.26	0.811889	-0.0905031
Sample 3	512.06	420.865	344.11	315.73	271.224	369.91	473.111	273.804				2980.81	358.945	470.208	138.353	145.126	489.187	639.199	183.181					2424.2	1.22961	0.0897666
Sample 4	448.413	602.721	591.445	395.051	728.258	297.017						3062.9	628.077	453.362	483.704	371.756	504.135	355.303						2796.34	1.09533	0.039544
Sample 5	2570.59	392.787	1234.66	769.072								4967.1	430.642	1358.9	134.596	237.807	500.204	2069.41	674.273					5405.83	0.918841	-0.0367596
Sample 6	585.621	833.458	765.19	122.301	200.599	186.363	521.235	301.223	159.509	212.571	195.423	4083.49	1068.68	522.853	347.814	552.943	676.214	898.491	1514.2	186.04				5767.23	0.708051	-0.149936
Sample 7	515.088	1574.71	237.484	234.248								2561.53	921.14	455.878	678.479	190.893	625.741							2872.13	0.891856	-0.0497055
Sample 8	91.538	50.313	91.538	48.041	241.829	337.262	77.255	97.705	146.396	45.444		1227.32	346.027	185.997	58.753	81.8	127.569	196.385	439.188	98.355	604.086	197.034		2335.19	0.525576	-0.279365
Sample 9	220.73	176.584	174.961	62.973	59.402	68.167	167.17	569.029				1499.02	307.399	183.401	179.181	310.969	160.029	198.657	99.004	412.895	132.438	153.213	94.459	2137.19	0.701397	-0.154036
Sample 10	220.659	320.159	423.847	448.76	784.926	214.512	304.135					2717	201.247	467.85	466.555	647.504	570.738	580.768						2934.66	0.92583	-0.0334688
																											Antilog
																								Average	0.864297	-0.0742985	0.842755
emc	Clone									Sum	Twin-spot								Sum	Ratio (Clone/Twin-Spot)	Log scale			STDEV	0.201014	0.104334	1.27155
Sample 1	505.034	93.202	155.122	109.972						863.33	619.522	299.602	367.65	171.892	365.392	351.525	394.417		2570	0.335926	-0.473756
Sample 2	452.663	482.298	138.079	381.019						1454.06	1263.55	138.079	799.813	434.752	1748.13	383.949	432.472	271.598	5472.34	0.265711	-0.575591
Sample 3	179.763	1223.82	508.676							1912.26	2198.51	1153.8	434.101	1417.58	923.889	130.914	245.871		6504.67	0.293982	-0.531679
Sample 4	37.733	18.705								56.438	852.38	372.815	148.997	312.507	841.737	276.387			2804.82	0.0201218	-1.69633
Sample 5	339.321	263.661	726.215	403.516	46.427					1779.14	1626.67	1827.29	899.887	1446.7	2230.8	1005.92			9037.27	0.196867	-0.705827
Sample 6	185.366	310.528	327.163	297.853	133.083	596.499				1850.49	1226.27	425.391	876.924	451.533	1000.5	683.636	1250.83	1116.16	7031.24	0.263182	-0.579744
Sample 7	137.314	330.256	153.852	170.891	150.344	65.65	83.691	153.852	170.891	1416.74	1509.2	911.56	1841.4	662.808	1509.2	874.207			7308.37	0.193852	-0.71253
Sample 8	381.472	40.531	71.526	451.409						944.938	977.523	1728.55	1955.84	739.103	1686.43				7087.44	0.133326	-0.875086
Sample 9	167.053	82.559	243.163							492.775	407.636	128.999	132.224	674.664	532.12				1875.64	0.262723	-0.580502
Sample 10	326.051	144.911	105.125	102.538	119.681					798.306	535.654	187.285	163.672	1249.86	281.413	426.971	499.103	578.999	3922.96	0.203496	-0.691444
																						Antilog
																			Average	0.216919	-0.742249	0.18103
																			STDEV	0.0285874	0.354258	2.26078
dronc	Clone						Sum	Twin-Spot							Sum	Ratio (Clone/Twin-Spot)	Log Scale
Sample 1	1241.56						1241.56	792.314							792.31	1.56701	0.195073
Sample 2	1204.42	227.49	459.47	177.82	74.65		2143.85	844.92	132.33	249.921	534.126	311.44			2072.74	1.03431	0.0146502
Sample 3	165.892	136.715	233.675	123.044	191.495	549.531	1400.35	138.284	333.496	111.165	423.369	635.614			1641.93	0.852871	-0.0691169
Sample 4	1225.39	989.897	1261.11	917.324			4393.72	546.592	741.464	872.759	1198.54	773.151			4132.51	1.06321	0.0266189
Sample 5	1012.53	587.18	622.64	288.952	585.408	438.858	3535.57	775.527	619.471	449.156	423.025	255.076	646.405	484.011	3652.67	0.96794	-0.0141515
Sample 6	2570.59	692.87	1244.66	789.072			5297.18	430.642	1358.9	734.596	437.807	500.204			3462.15	1.53003	0.184699
																		Antilog
															Average	1.16923	0.0562954	1.1384
															STDEV	0.302804	0.108676	1.28433
dronc emc	Clone							Sum	Twin-Spot										Sum	Ratio	Log Scale
1	751.277	192.834	72.798	20.707	620.06			1657.68	234.895	1320.31	66.974	210.306	321.606	617.976	581.738	130.39	438.083		3922.28	0.422631	-0.374039
2	1098.34	920.65	560	1105.81				3684.8	1520	2295.1									3815.1	0.965846	-0.0150922
3	65.892	136.715	223.675	123.044	71.495	49.531	34.515	704.867	138.284	333.496	111.165	423.369	635.614						1641.93	0.429292	-0.367247
4	220.659	2320.16	423.847	448.76	784.926	214.512	304.135	4717	580.768	201.247	467.85	466.555	1647.5	570.738	56.25				3990.91	1.18193	0.0725935
5	505.034	93.202	155.122	109.972				863.33	619.522	299.602	367.65	171.892	365.392	351.525	394.417				2570	0.335926	-0.473756
6	167.053	82.559	283.163	123.05				655.825	427.636	128.999	132.224	674.664	512.12						1875.64	0.349653	-0.456362
7	145.235	147.176	98.98	373.276	354.192	434.1		1552.96	2140.03	531.044	80.866	266.533							3018.47	0.514485	-0.288627
																						Antilog
																			Average	0.599967	-0.27179	0.534823
																			STDEV	0.334867	0.215716	1.6433
eH99	Clone													Sum	Twin-spot																			Sum	Ratio (Clone/Twin-Spot)	Log scale
Sample 1	274.347	932.539	426.645											1633.53	592.944	358.574	743.525																	1695.04	0.963711	-0.0160533
Sample 2	377.758	749.583	791.138											1918.48	426.411	478.887	1075.24	1278.02																3258.55	0.588752	-0.230067
Sample 3	233.559	1399.79	908.381											2541.73	1075.65	1279.48	811.14																	3166.27	0.802753	-0.0954183
Sample 4	426.184	608.381	913.279	488.764										2436.61	943.175	485.596	702.648	815.928	586.702															3534.05	0.689466	-0.161487
Sample 5	362.236	100.603	331.532	946.909										1741.28	320.753	434.748	410.904																	1166.4	1.49286	0.174019
Sample 6	300.176	190.427	662.411	724.145	554.296	180.628	189.12	285.477	428.869	1914.72	159.07	200.879	153.191	5943.41	259.02	217.211	97.01	282.537	404.372	462.839	130.98	184.221	260.326	199.246	204.799	112.688	54.221	114.322	214.924	104.196	217.864	141.105	54.221	3716.1	1.59937	0.203948
Sample 7	145.235	147.176	98.98	373.276	354.192									1118.86	2140.03	501.044	80.866	266.533																2988.47	0.374392	-0.426674
Sample 8	614.718	544.216	512.529	191.703										1863.17	595.706	553.722	866.626	1444.11																3460.17	0.538461	-0.268846
Sample 9	426.184	608.381	913.279	488.764										2436.61	943.175	485.596	702.648	815.928	586.702															3534.05	0.689466	-0.161487
Sample 10	377.758	749.583	791.138											1918.48	426.411	478.887	1075.24	1278.02																3258.55	0.588752	-0.230067
																																					Antilog
																																		Average	0.832798	-0.121213	0.756461
																																		STDEV	0.129027	0.196259	1.5713
H99	Clone								Sum	Twin-spot								Sum	Ratio (Clone/Twin-Spot)	Log Scale
Sample 1	1350.37	766.031	489.957						2606.36	414.842	626.775	322.411	972.136					2336.16	1.11566	0.0475307
Sample 2	298.815	454.652	270.648						1024.12	502.719	229.01	323.92						1055.65	0.970128	-0.0131708
Sample 3	984.959	382.767	338.209	424.571	250.037				2380.54	283.326	612.283	544.806	185.394	236.85				1862.66	1.27803	0.106543
Sample 4	189.865	357.013	444.234	134.616	451.806	180.33	392.911	434.418	2585.19	576.326	84.696	213.984	221.275	356.733	65.906	328.408	145.273	1992.6	1.2974	0.113073
Sample 5	688.773	608.866	387.001	248.723	1064.11	268.7	120.141		3386.31	239.72	355.641	609.71	382.37	883.002				2470.44	1.37073	0.136952
Sample 6	544.815	424.798	231.349						1200.96	446.117	579.557	581.136						1606.81	0.74742	-0.126435
Sample 7	170.074	138.284	280.543	487.969	363.99	181.995			1622.86	481.611	223.321	209.016	423.025					1336.97	1.21383	0.0841571
Sample 8	512.529	487.18	622.64	388.952	585.408	438.858	529.957		3565.52	775.527	619.471	449.156	423.025	255.076	646.405	484.011	624.224	4276.89	0.833671	-0.0790052
Sample 9	425.391	899.897	1161.31	917.324					3403.92	546.592	741.464	812.759	1198.54	773.151				4072.51	0.83583	-0.0778822
Sample 10	826.226	425.392	282.802	674.923	686.805	251.116	468.96		3616.22	493.517	113.279	848.882	637.691	1030.6	528.373			3652.35	0.99011	-0.00431659
																					Antilog
																		Average	1.06528	0.0187445	1.04411
																		STDEV	0.0698472	0.09262	1.23771

## Sheet: Comparison - Figure 1N
	FRT80	H99	dronc	emc	emc H99	emc dronc
	Log Scale	Log Scale	Log Scale	Log scale	Log Scale	Log Scale
Sample 1	-0.079	0.0475307	0.195073	-0.473756	-0.0160533	-0.454815
Sample 2	-0.091	-0.0131708	0.0146502	-0.575591	-0.230067	-0.0150922
Sample 3	0.09	0.106543	-0.0691169	-0.531679	-0.0954183	-0.367247
Sample 4	0.04	0.113073	0.0266189	-1.69633	-0.161487	0.0725935
Sample 5	-0.037	0.136952	-0.0141515	-0.705827	0.174019	-0.473756
Sample 6	-0.15	-0.126435	0.184699	-0.579744	0.203948	-0.456362
Sample 7	-0.05	0.0841571		-0.71253	-0.426674	-0.288627
Sample 8	-0.279	-0.0790052		-0.875086	-0.268846
Sample 9	-0.154	-0.0778822		-0.580502	-0.161487
Sample 10	-0.033	-0.00431659		-0.691444	-0.230067
t-test		#REF!		2.01224e-05	0.512982
mean	-0.0743	0.0187445	0.0562954	-0.742249	-0.121213	-0.283329
sd	0.104367	0.09262	0.108676	0.354258	0.196259	0.224095
nE0.5	3.16228	3.16228	3.16228	3.16228	3.16228	3.16228
sem	0.0330037	0.029289	0.0343665	0.112026	0.0620627	0.0708652
mean+sem	-0.0412963	0.0480335	0.0906619	-0.630223	-0.0591505	-0.212464
mean-sem	-0.107304	-0.0105445	0.021929	-0.854276	-0.183276	-0.354195
anti-log mean	0.842752	1.04411	1.1384	0.18103	0.756461	0.520799
gmean+sem	0.909293	1.11695	1.23215	0.234302	0.872669	0.613106
gmean-sem	0.781081	0.976013	1.05179	0.13987	0.655729	0.44239
