# Supplementary material for: Extramacrochaetae regulates Notch signaling in the Drosophila eye through non-apoptotic caspase activity
Source: eLife. 2024 Nov 20;12:RP91988. doi: 10.7554/eLife.91988 (PMC11578588; doi:10.7554/eLife.91988)
Supplement: Figure 3—source data 1. [file elife-91988-fig3-data1.xlsx]

## Sheet: Figure 3E
FRT80
		Mean grey level	Ratio
Sample 1	Clone	84.557	1.03091
	Non-clone	82.022
Sample 2	Clone	84.927	1.0349
	Non-clone	82.063
Sample 3	Clone	93.329	1.02766
	Non-clone	90.817
Sample 4	Clone	84.352	1.005
	Non-clone	83.932
Sample 5	Clone	85.352	1.00495
	Non-clone	84.932
emc		Mean
Sample 1	Clone	61.873	0.776392
	Non-clone	79.693
Sample 2	Clone	56.644	0.842027
	Non-clone	67.271
Sample 3	Clone	76.142	0.83644
	Non-clone	91.031
Sample 4	Clone	48.645	0.778831
	Non-clone	62.459
Sample 5	Clone	56.254	0.807771
	Non-clone	69.641
emcH99
		Mean
Sample 1	Clone	71.873	0.84863
	Non-clone	84.693
Sample 2	Clone	66.446	0.854479
	Non-clone	77.762
Sample 3	Clone	73.012	0.754233
	Non-clone	96.803
Sample 4	Clone	47.416	0.762046
	Non-clone	62.222
Sample 5	Clone	56.302	0.835267
	Non-clone	67.406
H99
		Mean
Sample 1	Clone	91.378	0.971879
	Non-clone	94.022
Sample 2	Clone	102.726	0.960298
	Non-clone	106.973
Sample 3	Clone	87.378	0.929336
	Non-clone	94.022
Sample 4	Clone	101.265	0.969999
	Non-clone	104.397
Sample 5	Clone	98.126	1.01713
	Non-clone	96.473
