# Supplementary material for: Extramacrochaetae regulates Notch signaling in the Drosophila eye through non-apoptotic caspase activity
Source: eLife. 2024 Nov 20;12:RP91988. doi: 10.7554/eLife.91988 (PMC11578588; doi:10.7554/eLife.91988)
Supplement: Figure 7—source data 1. [file elife-91988-fig7-data1.xlsx]

## Sheet: Figure 7E
FRT80
		Mean grey value	Ratio
1	Clone	43.768	1.01291
	Non-clone	43.21
2	Clone	37.625	0.979716
	Non-clone	38.404
3	Clone	34.918	1.03455
	Non-clone	33.752
4	Clone	36.14	0.949204
	Non-clone	38.074
5	Clone	34.918	1.03455
	Non-clone	33.752
emc
		Mean
1	Clone	76.761	1.34716
	Non-clone	56.98
2	Clone	79.499	1.41513
	Non-clone	56.178
3	Clone	80.868	1.33648
	Non-clone	60.508
4	Clone	70.438	1.16598
	Non-clone	60.411
5	Clone	81.406	1.24628
	Non-clone	65.319
emc dronc
		Mean
1	Clone	88.791	1.14339
	Non-clone	77.656
2	Clone	90.65	1.18069
	Non-clone	76.777
3	Clone	82.569	1.17113
	Non-clone	70.504
4	Clone	75.971	1.02187
	Non-clone	74.345
5	Clone	71.612	1.00425
	Non-clone	71.309
emcH99		Mean
1	Clone	33.333	0.973966
	Non-clone	34.224
2	Clone	32.49	0.897514
	Non-clone	36.2
3	Clone	28.592	1.03131
	Non-clone	27.724
4	Clone	36.146	1.01434
	Non-clone	35.635
5	Clone	30.943	0.952561
	Non-clone	32.484
